# Supplementary material for: Patterns of alternative splicing in response to cold acclimation in fish
Source: Oxford University Press journal article supplement (doi:10.1242/jeb.193516), 2019-01-01
Supplement: jeb193516supp.pdf [file jeb193516supp.pdf]

**A: *F. heteroclitus***

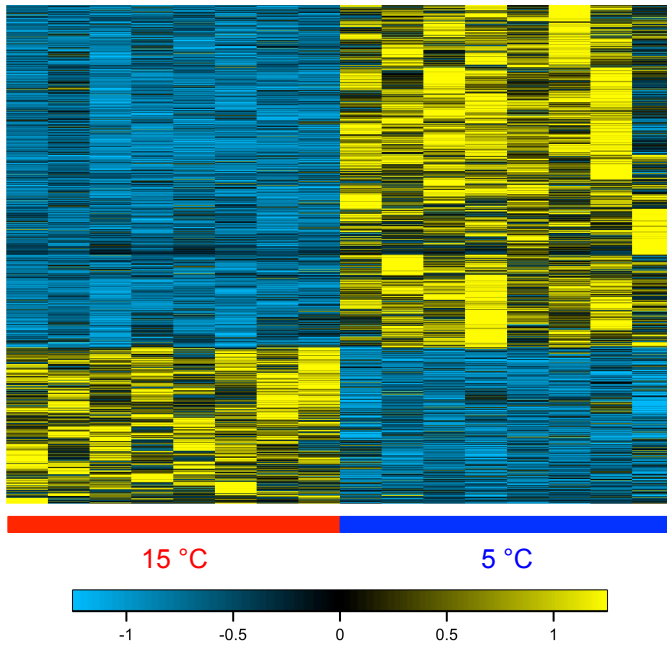

**B: *G. aculeatus***

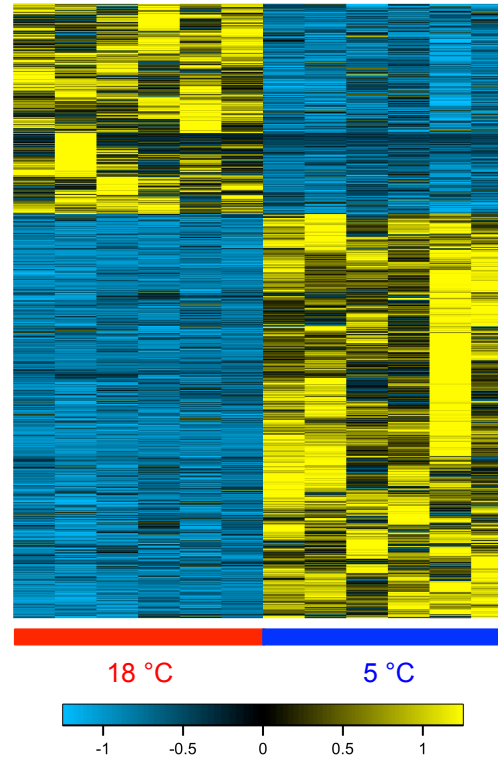

**C: *D. rerio***

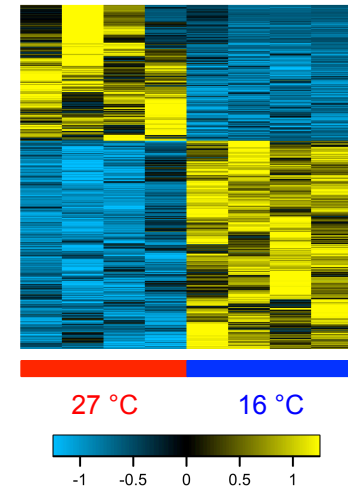

Figure S1. Heatmaps of differentially expressed (DE) genes as a result of cold acclimation in killifish (A), stickleback (B) and zebrafish (C). Each row represents expression values ( $\log_2$  counts per million) for one gene normalized to the mean expression of that gene across all fish (yellow: higher expression; light blue: lower expression). Columns display expression values for individuals fish (red horizontal bars: warm-acclimated fish; royal blue horizontal bars: cold-acclimated fish).

Table S1 -S4.

[Click here to Download Tables S1 - S4](#)
